# Supplementary material
Source: publisher figshare collection journal article supplement (https://gsajournals.figshare.com/articles/dataset/_/6376844)
Supplement: Supplementary file 1 [file 1]

## **SUPPLEMENTAL DATA**

### **Functional impact of the H2A.Z histone variant during meiosis in *Saccharomyces cerevisiae***

Sara González-Arranz\*, Santiago Caverro\*, Macarena Morillo-Huesca<sup>†</sup>, Eloisa Andújar<sup>‡</sup>, Mónica Pérez-Alegre<sup>‡</sup>, Félix Prado<sup>†</sup> and Pedro San-Segundo\*, <sup>1</sup>

\*Institute of Functional Biology and Genomics (IBFG). Consejo Superior de Investigaciones Científicas (CSIC) and University of Salamanca, 37007 Salamanca, Spain

<sup>†</sup>Department of Genome Biology and <sup>‡</sup>Genomics Unit. Centro Andaluz de Biología Molecular y Medicina Regenerativa (CABIMER), CSIC-University of Seville-University Pablo Olavide, 41092 Seville, Spain

<sup>1</sup>Corresponding author

#### **Supplemental Figures (Figures S1-S8)**

**Table S1 (Strains list)**

**Table S2 (Plasmids list)**

**Table S3 (Antibodies list)**

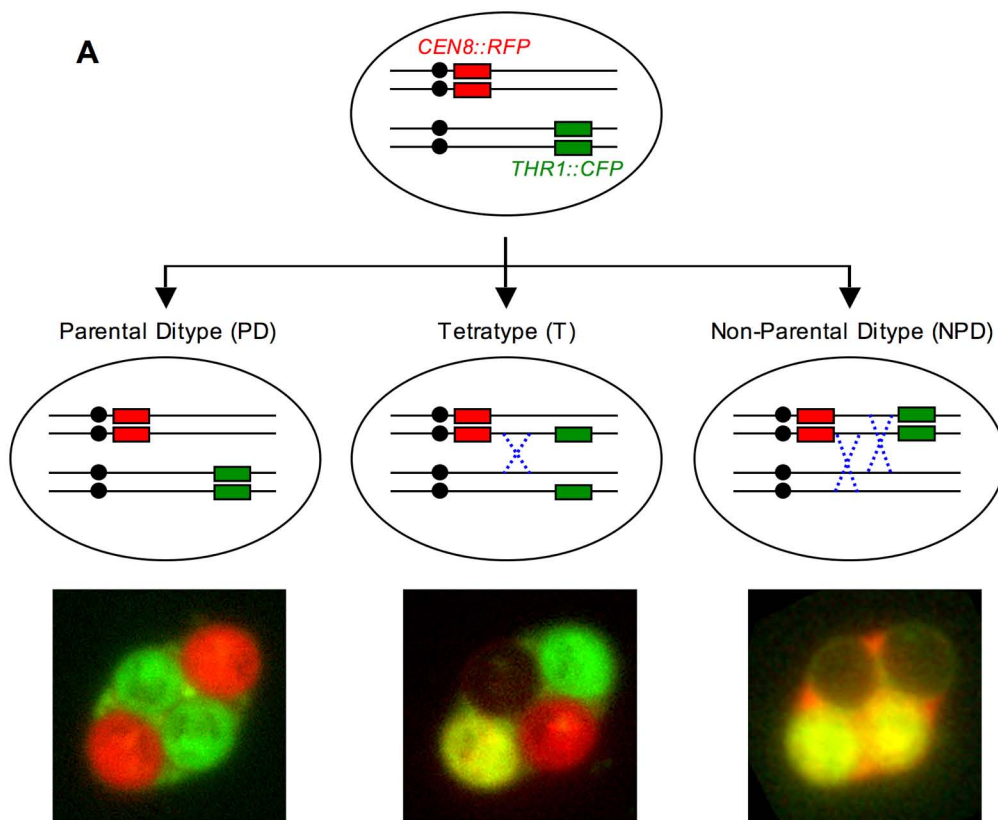

**B**

|             | PD(%) | T(%)  | NPD(%) | Genetic distance (cM) | n    |
|-------------|-------|-------|--------|-----------------------|------|
| wild type   | 61.62 | 38.00 | 0.37   | 20.11                 | 2245 |
| <i>htz1</i> | 55.92 | 43.72 | 0.38   | 22.98                 | 1027 |
| <i>mer3</i> | 73.71 | 16.13 | 0      | 8.91                  | 302  |

**Figure S1. Analysis of crossover frequency by spore-autonomous fluorescence assay.** (A) Cartoon depicting the potential configuration of the fluorescent reporter markers on Chromosome VIII and representative images of the different types of asci, according to (Thacker *et al.* 2011). Dashed crosses represent possible recombination events leading to each configuration. (B) The table shows the frequency of PD, T and NPD tetrads, map distance expressed in centiMorgan (cM) and the number of tetrads scored (n) pooled from two independent experiments. Strains are DP969 (wild type), DP973 (*htz1*) and DP974 (*mer3*).

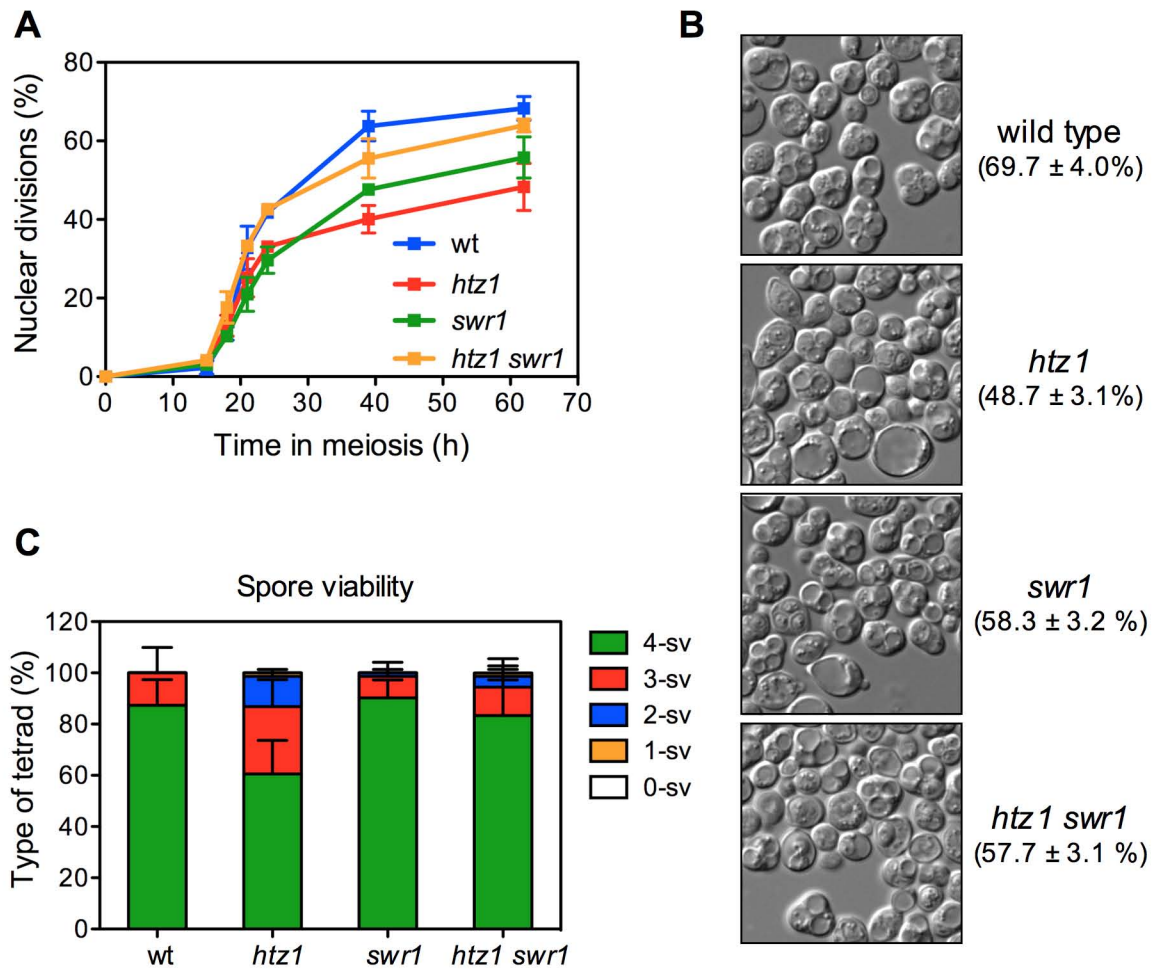

**Figure S2. Meiotic impact of the SWR1 complex in the presence or absence of H2A.Z.**

(A) Time course analysis of meiotic nuclear divisions; the percentage of cells containing two or more nuclei is represented. Error bars: range; n=2. (B) Representative DIC images of asci. The sporulation frequency after 62 hours in liquid sporulation medium is shown in parentheses. (C) Spore viability determined by tetrad dissection. The distribution of tetrad types as the percentage of tetrads with 4, 3, 2, 1 and 0 viable spores (4-sv, 3-sv, 2-sv, 1-sv and 0-sv, respectively) is represented. At least 288 spores were scored for each strain. Error bars: range; n=2. Strains are DP421 (wild type), DP630 (*htz1*), DP1174 (*swr1*) and DP1056 (*htz1 swr1*).

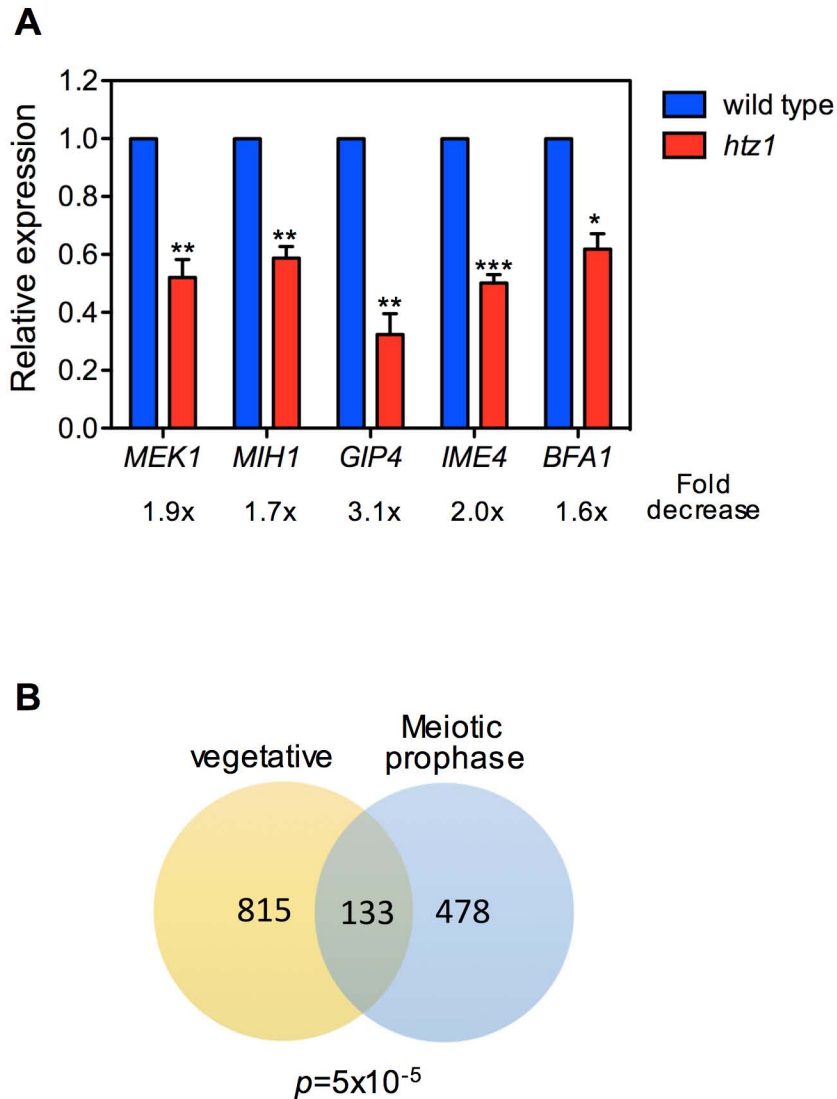

**Figure S3. Altered meiotic gene expression in the *htz1* mutant.** (A) RT-PCR analysis of mRNA levels of the indicated genes at 15 hours in meiosis. The graph shows relative levels in *htz1* normalized to those in the wild type. Error bars: SD; n=3 (except for *BFA1*; n=2). (B) Venn diagram showing the number of overlapping genes misregulated by *htz1* (1.5-fold cutoff) in vegetative and meiotic cells (15 h). The data for vegetative cells was obtained from (Morillo-Huesca *et al.* 2010). The *p* value was calculated by a hypergeometric test. Strains are DP421 (wild type) and DP1016 (*htz1*).

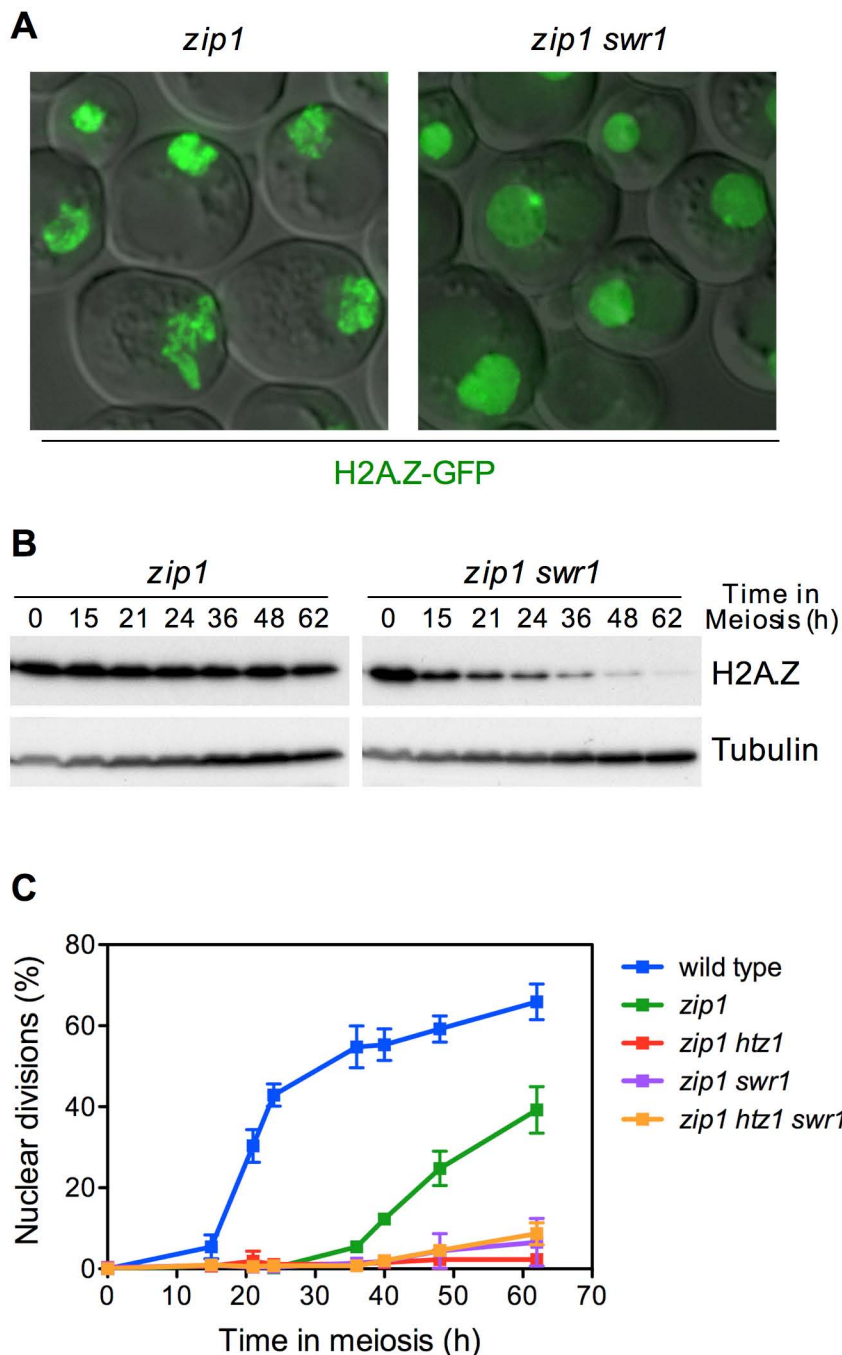

**Figure S4. SWR1-dependent chromatin incorporation of H2A.Z is required for normal *zip1*-induced meiotic checkpoint response.** (A) Representative images of *zip1* and *zip1 swr1* cells expressing *HTZ1-GFP* at 15 hours after meiotic induction. (B) Western blot analysis of H2A.Z production during meiosis detected with anti-GFP antibodies. Tubulin was used as a loading control. Strains in (A-B) are DP839 (*zip1 HTZ1-GFP*) and DP842 (*zip1 swr1 HTZ1-GFP*). (C) Time course analysis of meiotic nuclear divisions; the percentage of cells containing two or more nuclei is represented. Error bars: SD; n=3. Strains are DP421 (wild type), DP422 (*zip1*), DP776 (*zip1 htz1*), DP804 (*zip1 swr1*) and DP777 (*zip1 swr1 htz1*).



**A** Phospho-(S/T)Q  
Tubulin  
Chromatin

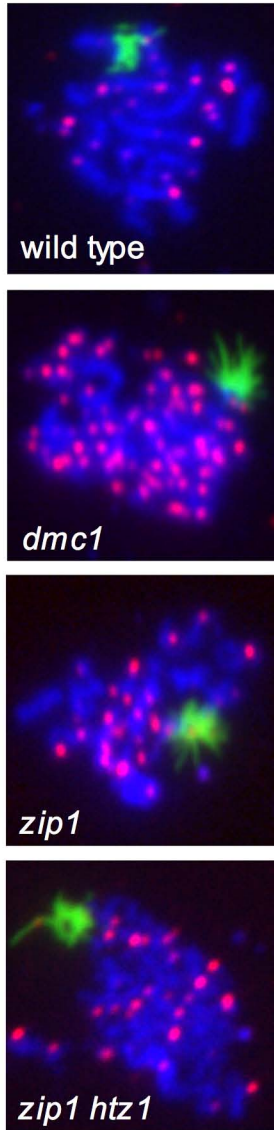

**B**

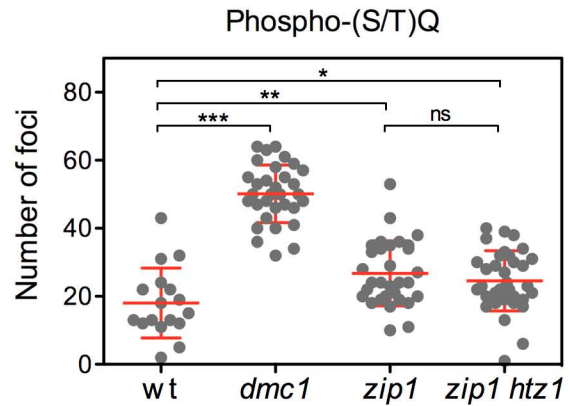

**C**

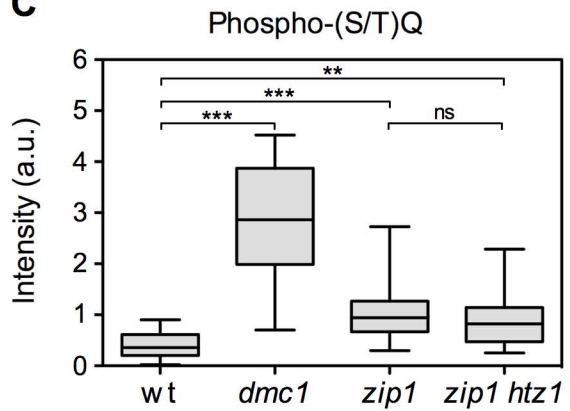

**Figure S5. The *zip1 htz1* mutant does not sustain additional Mec1/Tel1-dependent DNA damage signaling compared to *zip1*.** (A) Immunofluorescence of prophase meiotic chromosomes stained with DAPI (blue), and anti-phospho-(S/T)-Q (red) and anti-tubulin (green) antibodies. The *dmc1* mutant was included as a positive control for the accumulation of extensive meiotic DNA damage (unrepaired resected DSBs). Representative nuclei are shown. (B) Quantification of the number of phospho-(S/T)-Q foci per nucleus. Error bars: SD. (C) Quantification of the fluorescence intensity of the phospho-(S/T)-Q signal per nucleus. Whiskers in the box plot represent the maximum to minimum values. The strains used and the number of nuclei scored in (B-C) are: DP421 (wild type; n=17), DP590 (*dmc1*; n=32), DP1525 (*zip1*; n=31) and DP1526 (*zip1 htz1*; n=34).

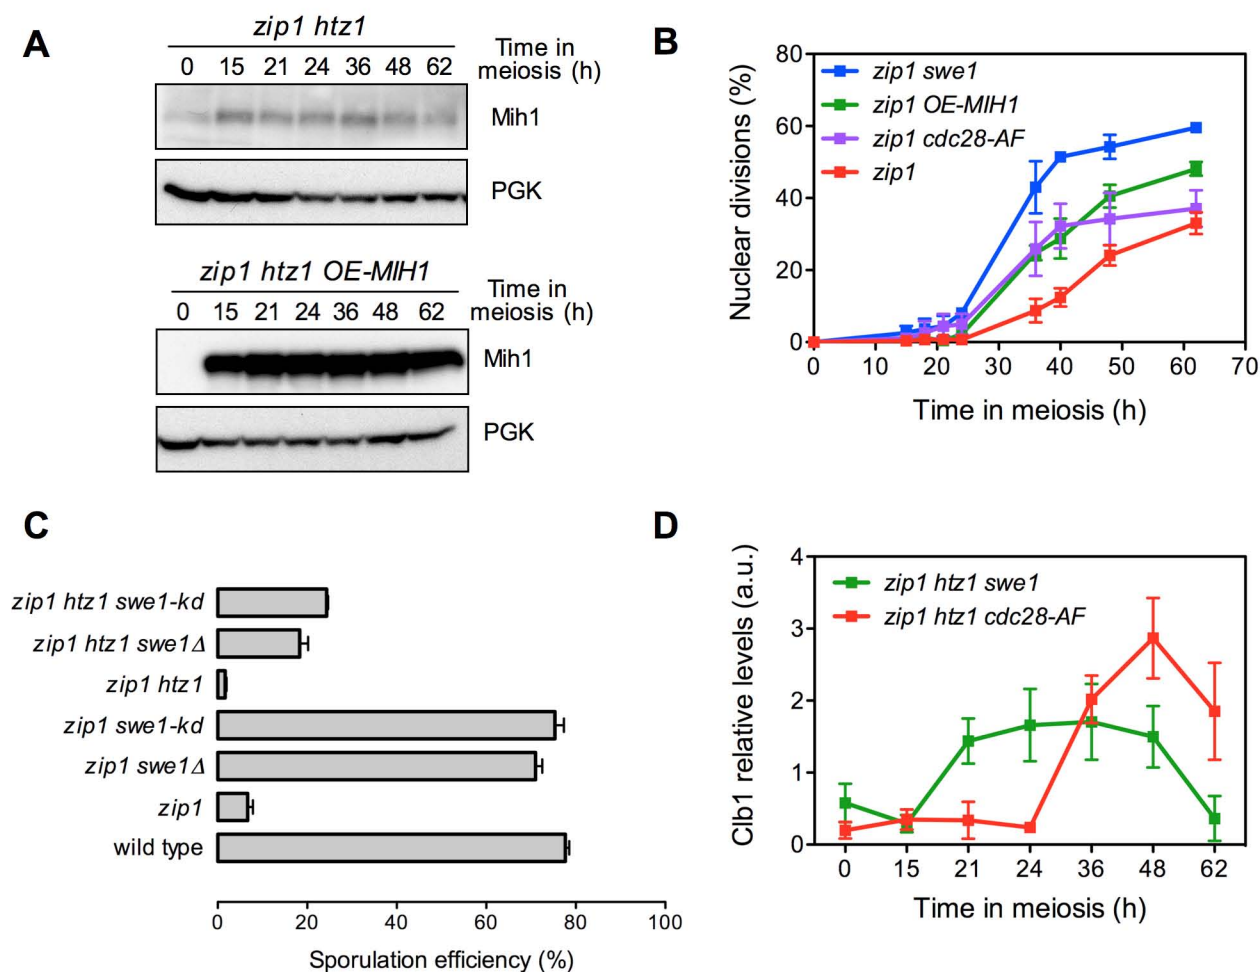

**Figure S6. Additional analysis of the role of CDK inhibitory phosphorylation in the meiotic checkpoint.** (A) Western blot showing *MIH1-GFP* overexpression from the *HOP1* promoter in a high-copy plasmid. The DP1134 strain (*zip1 htz1 MIH1-GFP*) was transformed with vector alone (left panels) or with the pSS265 plasmid (right panels). PGK was used as a loading control. MiH1 was detected with anti-GFP antibodies. (B) Faster meiotic progression in *zip1 cdc28-AF* and *zip1 OE-MIH1* compared to *zip1*. Time course analysis of meiotic nuclear divisions; the percentage of cells containing two or more nuclei is represented. Strains are DP1157 (*zip1 swe1*), DP1153 (*zip1 cdc28-AF*) and DP422 transformed with empty vector pSS248 (*zip1*) or with pSS265 (*zip1 OE-MIH1*). Error bars: SD; n=3. (C) The kinase-dead *swe1-N584A* mutant (*swe1-kd*) phenocopies *SWE1* deletion. The sequence changes introduced to generate the *swe1-N584A* mutation in the genomic locus by *delitto perfetto* are shown. The graph represents the sporulation efficiency determined by microscopic counting as the percentage of cells forming mature or immature asci after 3 days on sporulation plates. Error bars: SD; n=3. Strains are: DP1353 (wild type), DP1354 (*zip1*), DP1157 (*zip1 swe1*) and DP1467 (*zip1 swe1-kd*), DP1414 (*zip1 htz1*), DP1113 (*zip1 htz1 swe1*) and DP1468 (*zip1 htz1 swe1-kd*). (D) Quantification of Clb1 levels, normalized to PGK, throughout meiosis in the indicated strains. Error bars: SD; n=3. Strains are DP1113 (*zip1 htz1 swe1*) and DP1416 (*zip1 htz1 cdc28-AF*).

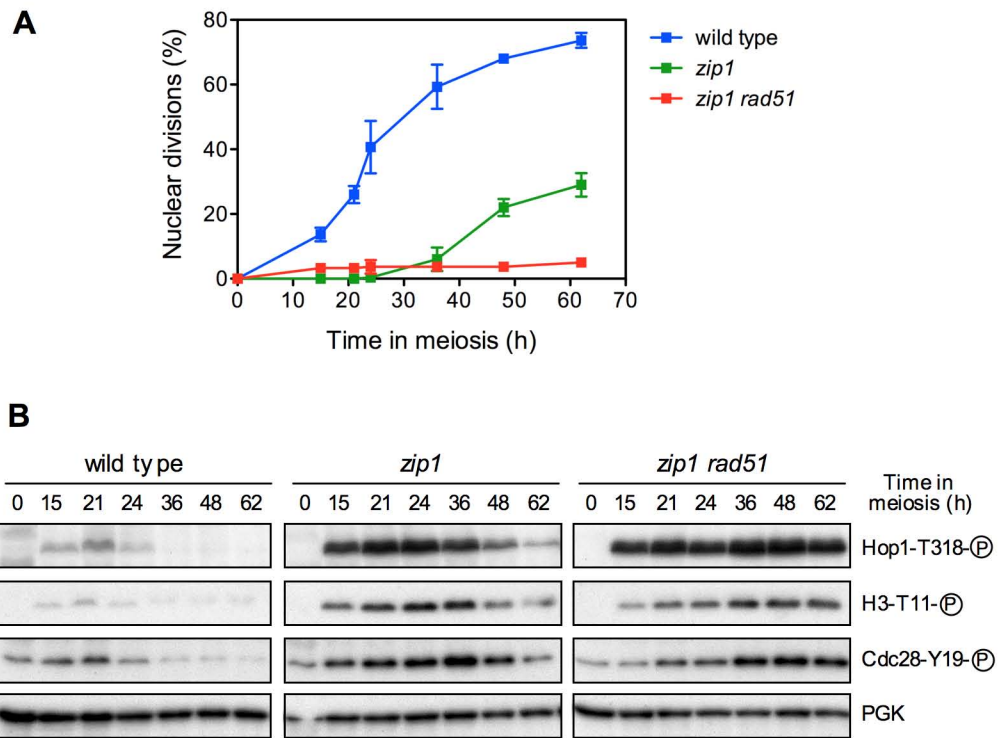

**Figure S7. Deletion of *RAD51* leads to sustained checkpoint activation and meiotic arrest in *zip1*.** (A) Time course analysis of meiotic nuclear divisions; the percentage of cells containing two or more nuclei is represented. Error bars: SD; n=3. (B) Western blot analysis of the indicated molecular markers of checkpoint activity. PGK was used as a loading control. Strains are DP1359 (wild type), DP1360 (*zip1*) and DP1364 (*zip1 rad51*).



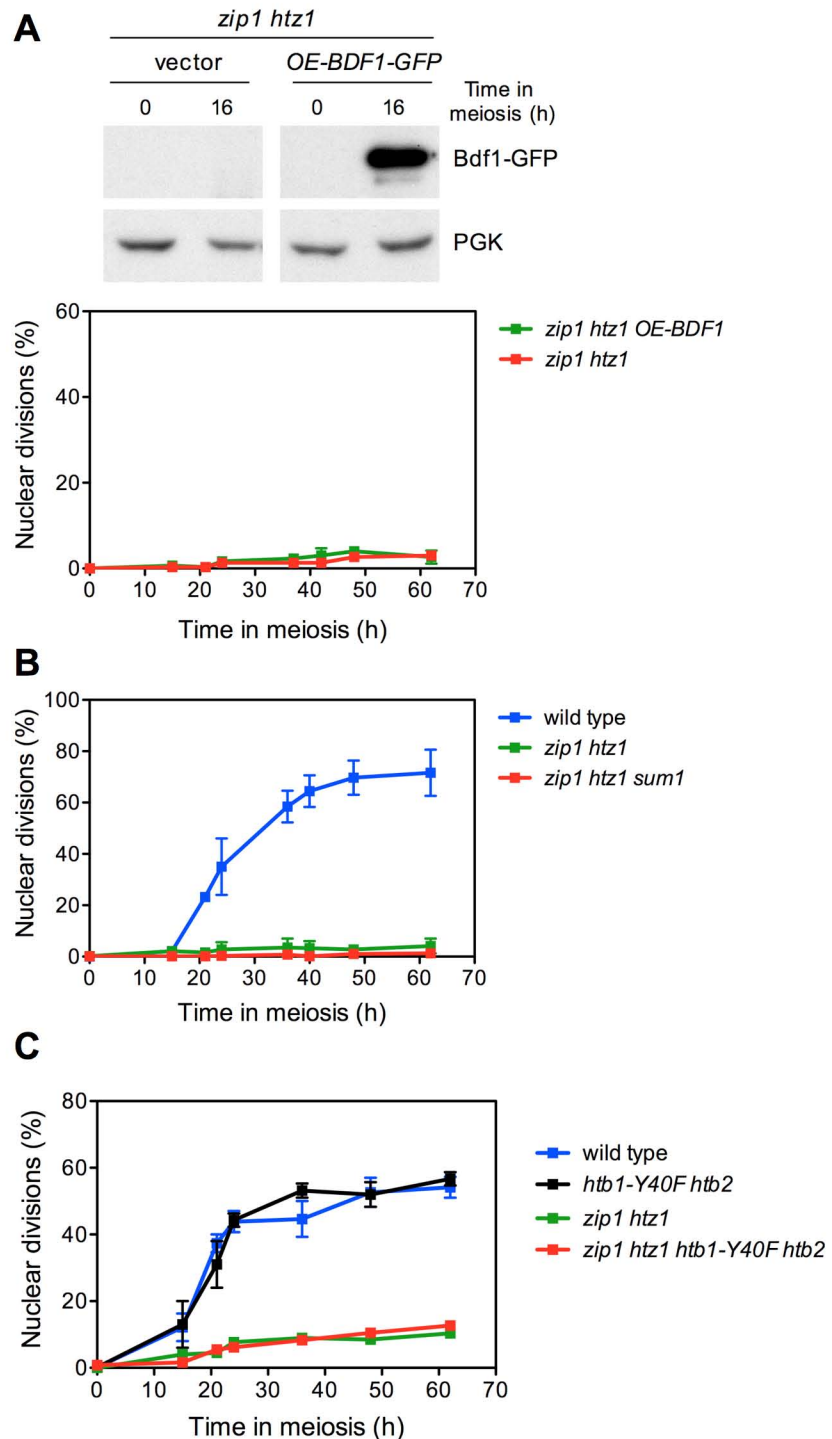

**Figure S8. Meiosis-specific overexpression of *BDF1*, deletion of *SUM1* and mutation of *H2B-Y40* do not suppress *zip1 htz1* arrest.** (A) Upper panel; western blot analysis of *zip1 htz1* cells (DP1017) transformed with vector (pSS248) or with a 2-micron plasmid expressing *BDF1-GFP* from the *HOP1* promoter (*OE-BDF1-GFP*; pSS354). Extracts were prepared at time zero or 16 hours after meiotic induction (around the peak of prophase) and analyzed with anti-GFP antibodies. PGK was used as a loading control. Lower panel; time course analysis of meiotic nuclear divisions in the same strains. The percentage of cells containing two or more nuclei is represented. Error bars: SD; n=3. (B) Time course analysis of meiotic nuclear divisions in the indicated strains. Wild type (DP421), *zip1 htz1* (DP630) and *zip1 htz1 sum1* (DP1441). Error bars: range; n=2. (C). Time course analysis of meiotic nuclear divisions in the indicated strains. Wild type (DP1445), *htb1-Y40F htb2* (DP1446), *zip1 htz1* (DP1449) and *zip1 htz1 htb1-Y40F htb2* (DP1450). Error bars: range; n=2.

**Table S1. *Saccharomyces cerevisiae* strains**

| Strain | Genotype                                                                     | Source    |
|--------|------------------------------------------------------------------------------|-----------|
| DP421  | <i>MATa/MATα leu2,3-112 his4-260 thr1-4 ura3-1 trp1-289 ade2-1 lys2ΔNheI</i> | PSS Lab   |
| DP422  | DP421 <i>zip1::LYS2</i>                                                      | PSS Lab   |
| DP437  | DP421 <i>ZIP1-GFP</i>                                                        | PSS Lab   |
| DP449  | DP421 <i>zip1::LYS2 DDC2-GFP::TRP1</i>                                       | PSS Lab   |
| DP590  | DP421 <i>dmc1::hphMX4 p306(BrdU-Inc)::URA3/ura3-1</i>                        | PSS Lab   |
| DP630  | DP421 <i>htz1::URA3</i>                                                      | This work |
| DP631  | DP421 <i>zip1::LYS2 htz1::URA3</i>                                           | This work |
| DP713  | DP421 <i>mek1::kanMX6</i>                                                    | PSS Lab   |
| DP776  | DP421 <i>zip1::LYS2 htz1::URA3 DDC2-GFP::TRP1</i>                            | This work |
| DP777  | DP421 <i>zip1::LSY2 htz1::URA3 swr1::natMX4 DDC2-GFP::TRP1</i>               | This work |
| DP804  | DP421 <i>swr1::natMX4 zip1::LSY2 DDC2-GFP::TRP1</i>                          | This work |
| DP815  | DP421 <i>zip1::LYS2 htz1::URA3 spo11::natMX4 DDC2-GFP::TRP1</i>              | This work |
| DP816  | DP421 <i>zip1::LYS2 htz1::URA3 ddc2::TRP1 sml1::KanMX6</i>                   | This work |
| DP838  | DP421 <i>ZIP1-GFP htz1::URA3</i>                                             | This work |
| DP839  | DP421 <i>zip1::LYS2 HTZ1-GFP::kanMX6</i>                                     | This work |
| DP840  | DP421 <i>HTZ1-GFP::kanMX6</i>                                                | This work |
| DP841  | DP421 <i>swr1::natMX4 HTZ1-GFP::kanMX6</i>                                   | This work |
| DP842  | DP421 <i>zip1::LYS2 swr1::natMX4 HTZ1-GFP::kanMX6</i>                        | This work |
| DP969  | SK1 <i>CEN8::tdTomato-LEU2/CEN8 THR1:mCerulean-TRP1/THR1</i>                 | S. Keeney |
| DP973  | SK1 <i>CEN8::tdTomato-LEU2/CEN8 THR1:mCerulean-TRP1/THR1 htz1::hphMX4</i>    | This work |
| DP974  | SK1 <i>CEN8::tdTomato-LEU2/CEN8 THR1:mCerulean-TRP1/THR1 mer3::hphMX4</i>    | This work |
| DP1016 | DP421 <i>htz1::hphMX4</i>                                                    | This work |
| DP1017 | DP421 <i>zip1::LYS2 htz1::hphMX4</i>                                         | This work |
| DP1056 | DP421 <i>htz1::URA3 swr1:: natMX4</i>                                        | This work |
| DP1113 | DP421 <i>zip1::LYS2 htz1::hphMX4 swe1::natMX4</i>                            | This work |
| DP1134 | DP421 <i>zip1::LYS2 htz1::hphMX4 MIH1-GFP::kanMX6</i>                        | This work |
| DP1144 | DP421 <i>htz1::URA3 spo11::ADE2</i>                                          | This work |
| DP1153 | DP421 <i>zip1::LYS2 cdc28-AF::LEU2</i>                                       | This work |
| DP1154 | DP421 <i>zip1::LYS2 htz1::hphMX4 cdc28-AF::LEU2</i>                          | This work |

|        |                                                                                                                       |           |
|--------|-----------------------------------------------------------------------------------------------------------------------|-----------|
| DP1157 | DP421 <i>zip1::LYS2 swe1::LEU2</i>                                                                                    | This work |
| DP1174 | DP421 <i>swr1::hphMX4</i>                                                                                             | This work |
| DP1185 | DP421 <i>TPR1-P<sub>GALI</sub>-ZIP1-GFP ura3::P<sub>GPD1</sub>-GAL4(848)ER::URA3/ura3-1</i>                           | This work |
| DP1186 | DP421 <i>TPR1-P<sub>GALI</sub>-ZIP1-GFP P<sub>GPD1</sub>-GAL4(848)ER::URA3/ura3-1 htz1::hphMX4</i>                    | This work |
| DP1259 | DP421 <i>htz1::URA3 mek1::kanMX6</i>                                                                                  | This work |
| DP1353 | DP421 <i>3MYC-SWE1</i>                                                                                                | This work |
| DP1354 | DP421 <i>zip1::LYS2 3MYC-SWE1</i>                                                                                     | This work |
| DP1359 | DP421 <i>TUB1/TUB1-GFP::TRP1</i>                                                                                      | PSS Lab   |
| DP1360 | DP421 <i>zip1::LYS2 TUB1/TUB1-GFP::TRP1</i>                                                                           | PSS Lab   |
| DP1364 | DP421 <i>zip1::LYS2 rad51::natMX4 TUB1/TUB1-GFP::TRP1</i>                                                             | PSS Lab   |
| DP1414 | DP421 <i>zip1::LYS2 htz1::hphMX4 3MYC-SWE1</i>                                                                        | This work |
| DP1416 | DP421 <i>zip1::LYS2 htz1::hphMX4 cdc28-AF::LEU2 3MYC-SWE1</i>                                                         | This work |
| DP1441 | DP421 <i>zip1::LYS2 htz1::URA3 sum1::natMX4</i>                                                                       | This work |
| DP1445 | DP421 <i>[hta1-htb1]::kanMX6 [hta2-htb2]::natMX4</i><br>pSS347 ( <i>HTA1-HTB1</i> )-TRP1                              | This work |
| DP1446 | DP421 <i>[hta1-htb1]::kanMX6 [hta2-htb2]::natMX4</i><br>pSS348 ( <i>HTA1-htb1-Y40F</i> )-TRP1                         | This work |
| DP1449 | DP421 <i>zip1::LYS2 htz1::hphMX4 [hta1-htb1]::kanMX6 [hta2-htb2]::natMX4</i><br>pSS347 ( <i>HTA1-HTB1</i> )-TRP1      | This work |
| DP1450 | DP421 <i>zip1::LYS2 htz1::hphMX4 [hta1-htb1]::kanMX6 [hta2-htb2]::natMX4</i><br>pSS348 ( <i>HTA1-htb1-Y40F</i> )-TRP1 | This work |
| DP1467 | DP421 <i>zip1::LYS2 3MYC-swe1-N584A</i>                                                                               | This work |
| DP1468 | DP421 <i>zip1::LYS2 htz1::hphMX4 3MYC-swe1-N584A</i>                                                                  | This work |
| DP1523 | DP421 <i>spo11::ADE2</i>                                                                                              | This work |
| DP1524 | DP421 <i>zip1::LYS2 spo11::ADE2</i>                                                                                   | This work |
| DP1525 | DP421 <i>zip1::LYS2 p306(BrdU-Inc)::URA3/ura3-1</i>                                                                   | This work |
| DP1526 | DP421 <i>zip1::LYS2 htz1::hphMX4 p306(BrdU-Inc)::URA3/ura3-1</i>                                                      | This work |

\* All strains are diploids isogenic to BR1919 (Rockmill and Roeder 1990), except strains DP969, DP973 and DP974, which are diploids isogenic to SK1. The haploid parents of DP969 (SK1) were obtained from S. Keeney (Thacker *et al.* 2011). Unless specified, all strains are homozygous for the indicated markers. DP421 is a *lys2* version of the original BR1919-2N.

Rockmill, B., and G. S. Roeder, 1990 Meiosis in asynaptic yeast. *Genetics* 126: 563-574.

Thacker, D., I. Lam, M. Knop and S. Keeney, 2011 Exploiting spore-autonomous fluorescent protein expression to quantify meiotic chromosome behaviors in *Saccharomyces cerevisiae*. *Genetics* 189: 423-439.

**Table S2. Plasmids**

| <b>Plasmid</b> | <b>Vector</b>    | <b>Relevant parts</b>                    | <b>Source/Reference</b>          |
|----------------|------------------|------------------------------------------|----------------------------------|
| pTK17          | pUC19            | <i>htz1::URA3</i>                        | (SANTISTEBAN <i>et al.</i> 2000) |
| pJC29          | pRS426           | <i>2μ URA3 CDC5</i>                      | (JASPERSEN <i>et al.</i> 1998)   |
| pR2042         | pRS305           | <i>LEU2 cdc28-AF</i>                     | (LEU and ROEDER 1999)            |
| pR2045         | pRS426           | <i>2μ URA3 CLB1</i>                      | (LEU and ROEDER 1999)            |
| pSS263         | pRS426           | <i>2μ URA3 NDT80</i>                     | This work                        |
| pSS248         | pYES2 derivative | <i>2μ URA3 P<sub>HOP1</sub>-GFP</i>      | This work                        |
| pSS265         | pSS248           | <i>2μ URA3 P<sub>HOP1</sub>-GFP-MIH1</i> | This work                        |
| pSS345         | pRS316           | <i>CEN6 URA3 HTA1-HTB1</i>               | This work                        |
| pSS347         | pRS314           | <i>CEN6 TRP1 HTA1-HTB1</i>               | This work                        |
| pSS348         | pRS314           | <i>CEN6 TRP1 HTA1-htb1-Y40F</i>          | This work                        |
| pSS354         | pSS248           | <i>2μ URA3 P<sub>HOP1</sub>-GFP-BDF1</i> | This work                        |

JASPERSEN, S. L., J. F. CHARLES, R. L. TINKER-KULBERG and D. O. MORGAN, 1998 A late mitotic regulatory network controlling cyclin destruction in *Saccharomyces cerevisiae*. *Mol Biol Cell* **9**: 2803-2817.

LEU, J. Y., and G. S. ROEDER, 1999 The pachytene checkpoint in *S. cerevisiae* depends on Swe1-mediated phosphorylation of the cyclin-dependent kinase Cdc28. *Mol Cell* **4**: 805-814.

SANTISTEBAN, M. S., T. KALASHNIKOVA and M. M. SMITH, 2000 Histone H2A.Z regulates transcription and is partially redundant with nucleosome remodeling complexes. *Cell* **103**: 411-422.



**Table S3. Primary antibodies**

| <b>Antibody</b>             | <b>Host and type</b> | <b>Application*<br/>(Dilution)</b> | <b>Source / Reference</b>                          |
|-----------------------------|----------------------|------------------------------------|----------------------------------------------------|
| Cdc2-Y15-P<br>(Cdc28-Y19-P) | Rabbit polyclonal    | WB (1:1000)                        | Cell Signaling Technology<br>#9111                 |
| Phospho-(S/T)Q              | Rabbit polyclonal    | IF (1:200)                         | Cell Signaling Technology<br>#2851                 |
| Cdc5                        | Goat polyclonal      | WB (1:1000)                        | Santa Cruz Biotechnology<br>sc-6733                |
| Cdc28<br>(PSTAIRE)          | Rabbit polyclonal    | WB (1:1000)                        | Santa Cruz Biotechnology;<br>sc53                  |
| Clb1                        | Goat polyclonal      | WB (1:100)                         | Santa Cruz Biotechnology;<br>sc-7647               |
| Hed1                        | Rabbit polyclonal    | WB (1:20000)                       | N. Hollingsworth<br>(CALLENDER <i>et al.</i> 2016) |
| Hed1-T40-P                  | Rabbit polyclonal    | WB (1:50000)                       | N. Hollingsworth<br>(CALLENDER <i>et al.</i> 2016) |
| Hop1-T318-P                 | Rabbit polyclonal    | WB (1:1000)                        | J. Carballo<br>(PENEDOS <i>et al.</i> 2015)        |
| H3-T11-P                    | Rabbit polyclonal    | WB (1:2000)                        | Abcam<br>ab5168                                    |
| Mek1                        | Rabbit polyclonal    | WB (1:1000)                        | PSS Lab<br>(ONTOSO <i>et al.</i> 2013)             |
| Ndt80                       | Rabbit polyclonal    | WB (1:5000)                        | M. Lichten<br>(BENJAMIN <i>et al.</i> 2003)        |
| Rad51                       | Rabbit polyclonal    | IF (1:300)                         | Santa Cruz Biotechnology<br>sc-33626               |
| Myc                         | Rabbit polyclonal    | WB (1:1000)                        | Sigma<br>c3956                                     |
| Pch2                        | Rabbit polyclonal    | IF (1:400)                         | PSS Lab / R. Freire                                |
| GFP (JL-8)                  | Mouse monoclonal     | WB (1:2000-10000)                  | Clontech<br>632381                                 |
| PGK (22C5D8)                | Mouse monoclonal     | WB (1:2000)                        | Invitrogene<br>459240                              |
| Tubulin (TAT1)              | Mouse monoclonal     | WB (1:10000)<br>IF (1:500)         | K. Gull<br>(ACOSTA <i>et al.</i> 2011)             |

\*WB, western blot; IF, immunofluorescence

ACOSTA, I., D. ONTOSO and P. A. SAN-SEGUNDO, 2011 The budding yeast polo-like kinase Cdc5 regulates the Ndt80 branch of the meiotic recombination checkpoint pathway. *Mol Biol Cell* **22**: 3478-3490.

BENJAMIN, K. R., C. ZHANG, K. M. SHOKAT and I. HERSKOWITZ, 2003 Control of landmark events in meiosis by the CDK Cdc28 and the meiosis-specific kinase Ime2. *Genes Dev* **17**: 1524-1539.

- CALLENDER, T. L., R. LAUREAU, L. WAN, X. CHEN, R. SANDHU *et al.*, 2016 Mek1 Down Regulates Rad51 Activity during Yeast Meiosis by Phosphorylation of Hed1. PLoS Genet **12**: e1006226.
- ONTOSO, D., I. ACOSTA, F. VAN LEEUWEN, R. FREIRE and P. A. SAN-SEGUNDO, 2013 Dot1-dependent histone H3K79 methylation promotes activation of the Mek1 meiotic checkpoint effector kinase by regulating the Hop1 adaptor. PLoS Genet **9**: e1003262.
- PENEDOS, A., A. L. JOHNSON, E. STRONG, A. S. GOLDMAN, J. A. CARBALLO *et al.*, 2015 Essential and Checkpoint Functions of Budding Yeast ATM and ATR during Meiotic Prophase Are Facilitated by Differential Phosphorylation of a Meiotic Adaptor Protein, Hop1. PLoS One **10**: e0134297.
